# Supplementary material for: Tuning ESIPT fluorophores into dual emitters
Source: PubMed Central journal article supplement — Chem Sci. 2016 Feb 23;7(6):3763–74. doi: 10.1039/c5sc04826e (PMC6008603; doi:10.1039/c5sc04826e), 2016-02-23
Supplement: SC-007-C5SC04826E-s001.pdf [file SC-007-C5SC04826E-s001.pdf]

# Tuning ESIPT Fluorophores into Dual Emitters : Electronic supporting Information

Cloé Azarias<sup>a</sup>, Simon Budzák<sup>a</sup>, Adèle D. Laurent<sup>a</sup>, Gilles Ulrich<sup>b</sup> and Denis Jacquemin<sup>\*a,c</sup>

Received Xth XXXXXXXXXXXX 20XX, Accepted Xth XXXXXXXXXXXX 20XX

First published on the web Xth XXXXXXXXXXXX 200X

DOI: 10.1039/b000000x

<sup>a</sup> CEISAM, UMR CNRS 6230, BP 92208, Université de Nantes, 2, Rue de la Houssinière, 44322 Nantes, Cedex 3, France. Tel: +33-2-51-12-55-64; E-mail: Denis.Jacquemin@univ-nantes.fr

<sup>b</sup> Institut de Chimie et Procédés pour l'Energie, l'Environnement et la Santé (ICPEES) UMR7515 CNRS Université de Strasbourg, 25 rue Becquerel, 67087 Strasbourg Cedex 02 (France)

<sup>c</sup> Institut Universitaire de France, 1, rue Descartes, F-75005 Paris Cedex 05, France.

## S1 Extra examples of potential energy surface/IRC

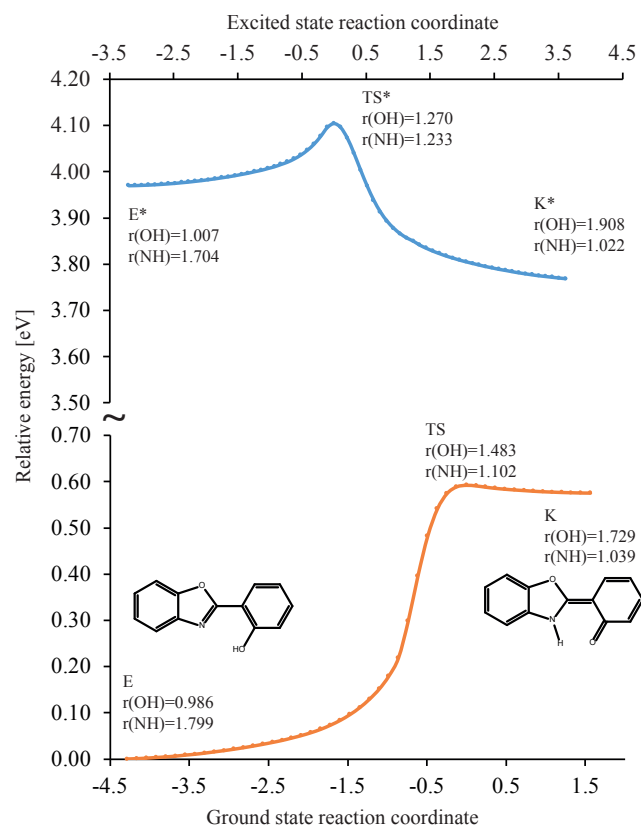

**Fig. S1** Energy profile for PT along the ground and excited state IRC for the dye number **1**. Energy scale is relative to the ground state enol form calculated at the M062X/6-31G(d) level. Bond lengths are in Å, reaction coordinate is defined in mass weighted coordinates ( $\text{Bohr}\sqrt{AMU}^{-1}$ )

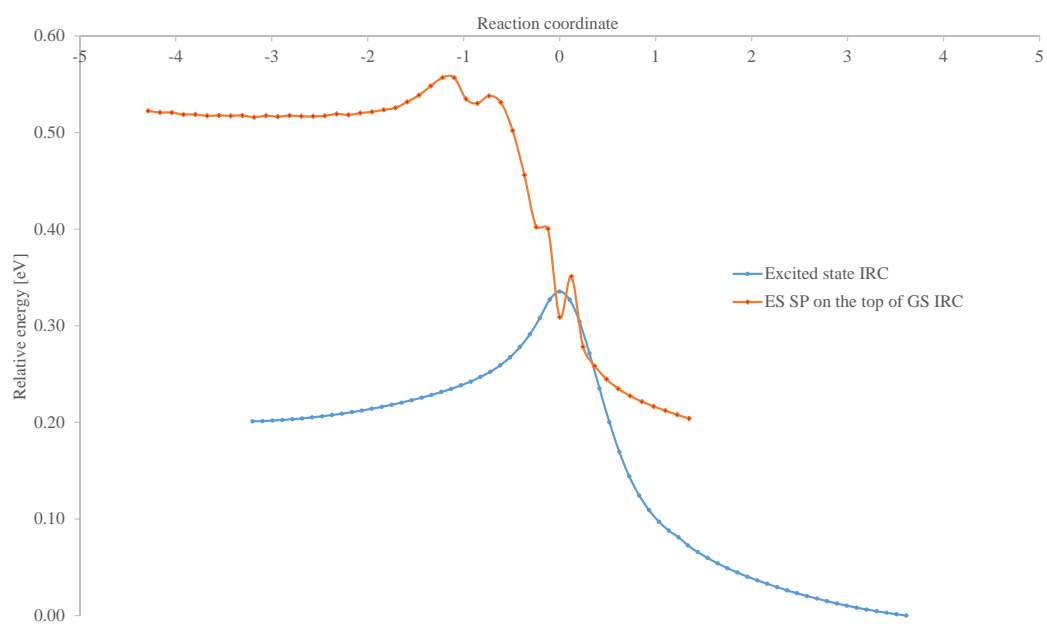

**Fig. S2** Energy profile for PT along the excited state IRC and the reaction profile in ES calculated as single point on the top of ground state IRC. Energy scale is relative to the  $K^*$  form calculated at the M062X/6-31G(d) level. Reaction coordinate is defined in mass weighted coordinates ( $\text{Bohr}\sqrt{AMU}^{-1}$ )

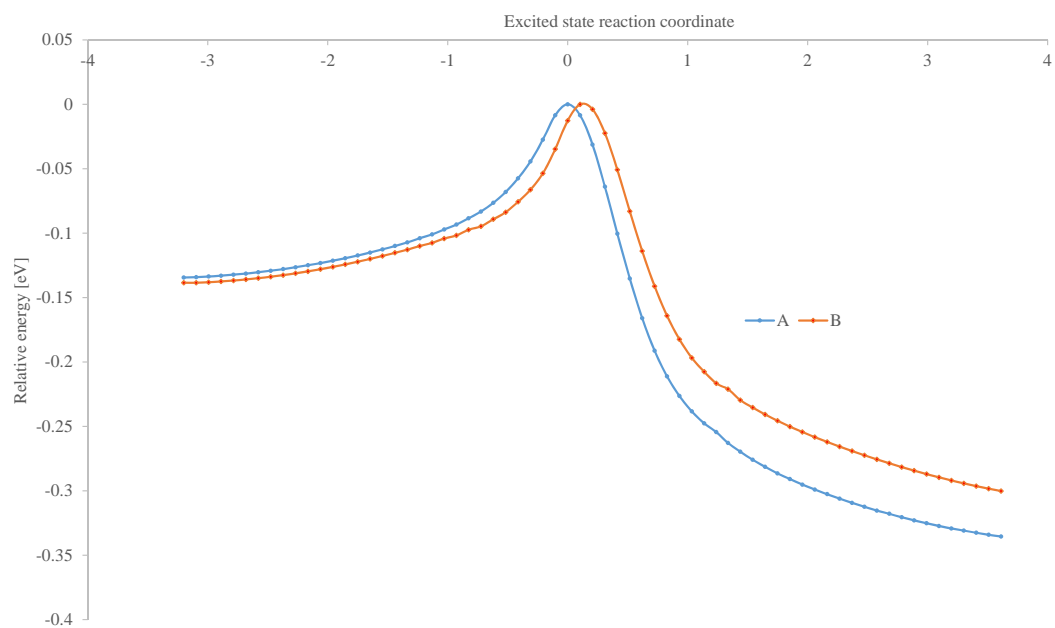

**Fig. S3** Energy profile for PT along the excited state IRC (6-31G(d) basis set) A and the reaction profile in ES calculated as 6-311+G(2d,p) single points on the top of ES IRC - B. Energy scale is relative to the TS\* form. Reaction coordinate is defined in mass weighted coordinates ( $\text{Bohr}\sqrt{AMU}^{-1}$ )

## S2 Comparison between TD-DFT and experimental values for the compounds of Table 1 and 4

**Table S1** Available experimental values compared to theoretical (TD)DFT simulations for HBO-ESIPT dyes. All theoretical values have been obtained from TD-DFT calculations and have not been corrected with ADC(2). See Table 1 for more details.

|    | Structures      |                      |                  |                 |         | Experiment                |                      |                      |      | Theory               |                      |                 |                   |
|----|-----------------|----------------------|------------------|-----------------|---------|---------------------------|----------------------|----------------------|------|----------------------|----------------------|-----------------|-------------------|
|    | R <sub>1</sub>  | R <sub>2</sub>       | R <sub>3</sub>   | R <sub>4</sub>  | Solvent | Observations              | $\lambda_{fl}^{E^*}$ | $\lambda_{fl}^{K^*}$ | Ref. | $\lambda_{fl}^{E^*}$ | $\lambda_{fl}^{K^*}$ | $\Delta G^{ES}$ | $\Delta G^{ES\#}$ |
| 1  | H               | H                    | H                | H               | 3MP     | Keto                      | —                    | ca.480               | 1    | 328                  | 410                  | -0.161          | -0.005            |
| 2  | H               | H                    | H                | H               | CH      | Keto                      | —                    | ca.490               | 2    | 328                  | 409                  | -0.162          | -0.003            |
| 3  | H               | H                    | H                | H               | CHL     | Keto                      | —                    | ca.489               | 3    | 330                  | 405                  | -0.173          | 0.020             |
| 4  | H               | H                    | H                | NH <sub>2</sub> | DCM     | Keto                      | —                    | 551                  | 4    | 426                  | 512                  | -0.070          | 0.031             |
|    |                 |                      |                  |                 |         | Keto (4/5) + Enol (1/5)   | 442                  | 565                  | 5    |                      |                      |                 |                   |
| 5  | H               | H                    | H                | CHO             | CHL     | Keto + vw Enol            | ca. 405              | 474                  | 6    | 330                  | 388                  | -0.208          | 0.029             |
| 6  | H               | H                    | H                | CHO             | DIOX    | Keto                      | —                    | 483                  | 6    | 328                  | 392                  | -0.198          | 0.012             |
| 7  | H               | H                    | NEt <sub>2</sub> | H               | CHL     | Enol                      | 382                  | —                    | 3    | 344                  | 383                  | 0.232           | 0.269             |
|    |                 |                      |                  |                 |         | Enol                      | 451                  | —                    | 7    |                      |                      |                 |                   |
| 8  | H               | H                    | NEt <sub>2</sub> | H               | DIOX    | Enol                      | 471                  | —                    | 7    | 341                  | 395                  | 0.201           | 0.251             |
| 9  | H               | H                    | NH <sub>2</sub>  | H               | DCM     | Keto (7/8) + Enol (1/8)   | 376                  | 467                  | 5    | 334                  | 383                  | 0.114           | 0.218             |
|    |                 |                      |                  |                 |         | Keto (3/5) + Enol (2/5)   | 390                  | 460                  | 8    |                      |                      |                 |                   |
| 10 | H               | H                    | NH <sub>2</sub>  | H               | CHL     | Keto (3/4) + Enol (1/4)   | 390                  | 460                  | 8    | 333                  | 387                  | 0.096           | 0.201             |
| 11 | H               | H                    | NH <sub>2</sub>  | H               | DIOX    | Keto (3/4) + Enol (1/4)   | 415                  | 487                  | 9    | 331                  | 394                  | 0.060           | 0.167             |
| 12 | H               | H                    | OMe              | H               | CHL     | Keto + vw Enol            | ca. 375              | ca. 467              | 3    | 329                  | 398                  | -0.028          | 0.103             |
| 13 | H               | H                    | Me               | H               | 3MP     | Keto                      | —                    | ca.480               | 1    | 329                  | 413                  | -0.108          | 0.030             |
| 14 | H               | C=C(CN) <sub>2</sub> | H                | H               | CH      | Keto + w Enol             | ca. 425              | ca. 550              | 10   | 387                  | 506                  | 0.174           | 0.227             |
| 15 | H               | C=C(CN) <sub>2</sub> | H                | H               | CHL     | Keto + Enol               | ca. 450              | ca. 625              | 10   | 401                  | 542                  | 0.069           | 0.315             |
| 16 | H               | CHO                  | H                | H               | CHL     | Keto                      | —                    | ca. 517              | 3    | 345                  | 423                  | -0.068          | 0.071             |
| 17 | H               | COOEt                | H                | H               | CHL     | Keto                      | —                    | ca. 495              | 3    | 340                  | 418                  | -0.118          | 0.048             |
| 18 | H               | NH <sub>2</sub>      | H                | H               | n-HEP   | Keto + vw Enol            | 390                  | 500                  | 11   | 357                  | 405                  | 0.075           | 0.163             |
| 19 | H               | NH <sub>2</sub>      | H                | H               | DCM     | Keto (9/10) + Enol (1/10) | 420                  | 485                  | 11   | 378                  | 399                  | 0.131           | 0.236             |
| 20 | H               | COOEt                | NEt <sub>2</sub> | H               | CHL     | Enol                      | 421                  | —                    | 3    | 363                  | 396                  | 0.340           | 0.338             |
| 21 | H               | COOEt                | OMe              | H               | CHL     | Keto + vw Enol            | ca. 375              | ca. 482              | 3    | 341                  | 412                  | 0.022           | 0.173             |
| 22 | H               | NH <sub>2</sub>      | NEt <sub>2</sub> | H               | DIOX    | Enol                      | 460                  | —                    | 7    | 359                  | 383                  | 0.285           | 0.292             |
| 23 | H               | NO <sub>2</sub>      | NEt <sub>2</sub> | H               | DIOX    | Keto + Enol               | 476                  | 656                  | 7    | 396                  | 465                  | 0.434           | 0.419             |
| 24 | NH <sub>2</sub> | H                    | NEt <sub>2</sub> | H               | DIOX    | Enol                      | 440                  | —                    | 7    | 352                  | 389                  | 0.240           | 0.270             |
| 25 | NO <sub>2</sub> | H                    | NEt <sub>2</sub> | H               | DIOX    | Enol                      | 440                  | —                    | 7    | 425                  | 521                  | 0.363           | 0.346             |
| 26 | NH <sub>2</sub> | H                    | H                | H               | n-HEP   | Keto (9/10) + Enol (1/10) | 400                  | 500                  | 12   | 364                  | 409                  | 0.034           | 0.171             |
| 27 | NH <sub>2</sub> | H                    | H                | H               | DCM     | Enol + vw Keto            | 450                  | ca. 480              | 12   | 384                  | 402                  | 0.015           | 0.187             |
| 28 | H               | H                    | H                | H               | CH      | Keto                      | —                    | 470                  | 2    | 327                  | 404                  | -0.273          | -0.029            |
|    |                 |                      |                  |                 |         | Keto                      | —                    | ca. 470              | 13   |                      |                      |                 |                   |
| 29 | H               | H                    | H                | H               | DIOX    | Keto + vwEnol             | 350                  | 468                  | 14   | 327                  | 400                  | -0.272          | -0.027            |
| 30 | H               | H                    | H                | NH <sub>2</sub> | DCM     | Keto                      | —                    | 539                  | 4    | 408                  | 490                  | -0.192          | -0.072            |
|    |                 |                      |                  |                 |         | Keto + vwEnol             | 414                  | 544                  | 5    |                      |                      |                 |                   |
| 31 | H               | H                    | H                | NH <sub>2</sub> | DIOX    | Keto + Enol               | 414                  | 568                  | 14   | 397                  | 482                  | -0.121          | -0.050            |
| 32 | H               | H                    | H                | OMe             | DIOX    | Keto + wEnol              | 368                  | 530                  | 14   | 359                  | 456                  | -0.275          | -0.059            |
| 33 | H               | H                    | H                | OH              | DIOX    | Keto + vwEnol             | 358                  | 525                  | 14   | 357                  | 448                  | -0.250          | -0.101            |
| 34 | H               | H                    | H                | Me              | DIOX    | Keto + vwEnol             | 352                  | 489                  | 14   | 334                  | 422                  | -0.224          | -0.018            |
| 35 | H               | H                    | H                | Cl              | DIOX    | Keto                      | —                    | 474                  | 14   | 337                  | 414                  | -0.303          | -0.057            |
| 36 | H               | H                    | H                | F               | DIOX    | Keto + vwEnol             | 350                  | 486                  | 14   | 337                  | 418                  | -0.273          | -0.081            |
| 37 | H               | H                    | NH <sub>2</sub>  | H               | DCM     | Enol                      | 445                  | —                    | 5    | 333                  | 374                  | -0.035          | 0.102             |
| 38 | H               | H                    | NEt <sub>2</sub> | H               | CH      | Keto + vwEnol             | ca. 370              | ca. 453              | 15   | 340                  | 384                  | 0.050           | 0.130             |
| 39 | H               | H                    | NEt <sub>2</sub> | H               | DIOX    | Enol                      | 386                  | —                    | 16   | 340                  | 382                  | 0.039           | 0.131             |
| 40 | H               | NH <sub>2</sub>      | NEt <sub>2</sub> | H               | DIOX    | Enol                      | 431                  | —                    | 16   | 355                  | 377                  | 0.139           | 0.175             |
| 41 | H               | NO <sub>2</sub>      | NEt <sub>2</sub> | H               | DIOX    | Keto + vwEnol             | —                    | 531                  | 16   | 400                  | 479                  | 0.247           | 0.235             |

### S3 Density variation plots for selected compounds

Figure S4 depicts the density variation plots for the singly-substituted HBO series. For all compounds, one notices an increase (decrease) of density figures on the nitrogen atom (hydroxyl group) though the amplitude of this effect is strongly system-dependent. This means that after photon absorption, the nitrogen (OH group) becomes more basic (acidic). For both R<sub>1</sub> and R<sub>2</sub> positions, compared with the non-substituted dye, adding OMe, NH<sub>2</sub> and NMe<sub>2</sub> groups, induces a loss (gain) of the electronic density on the hydroxyl group (nitrogen atom), indicating less acidic (basic) functions. The ESIPT process is therefore expected to be less efficient, or not effective at all for those cases.

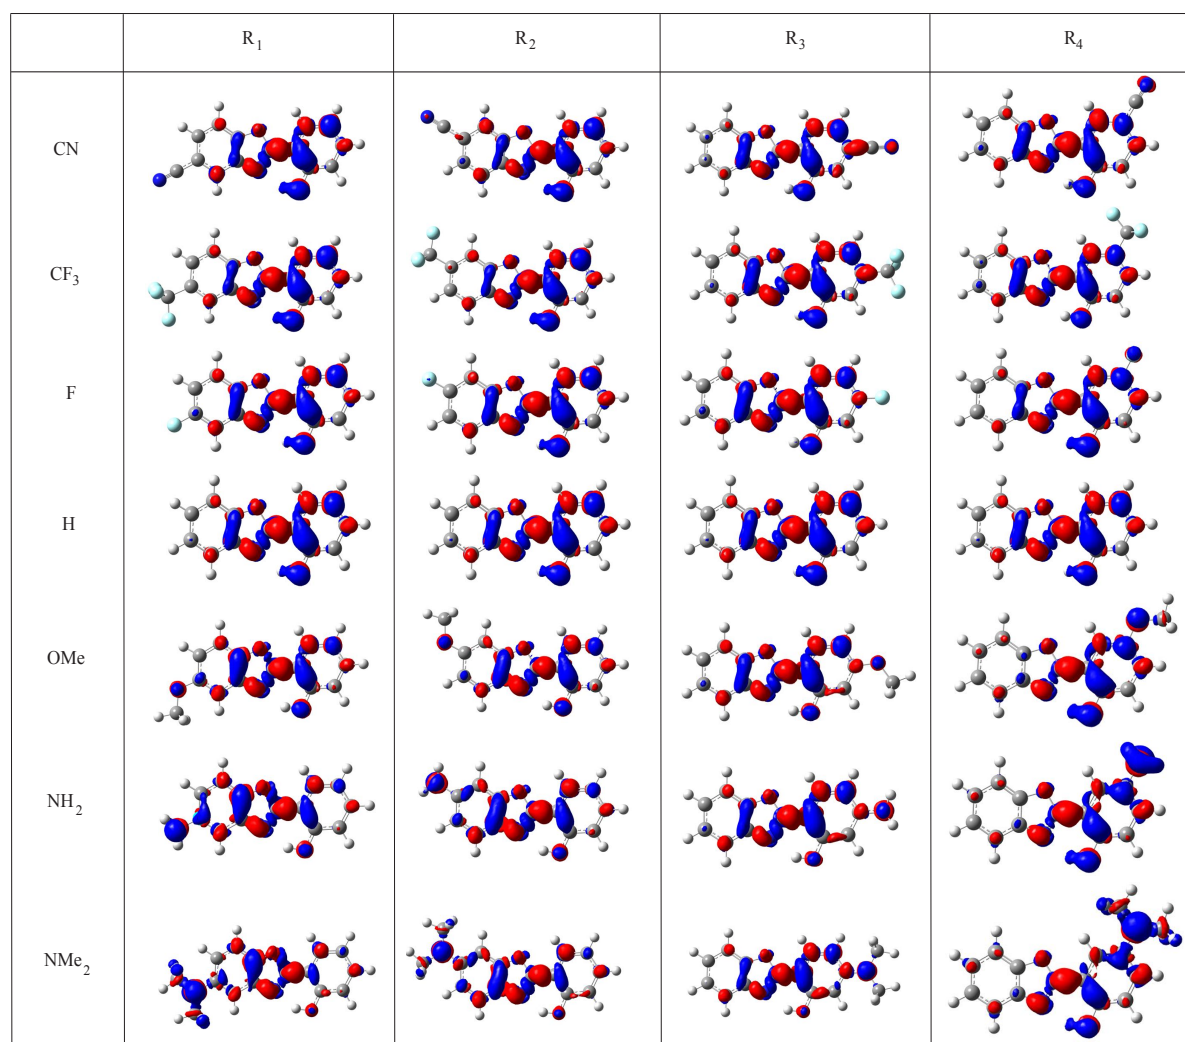

**Fig. S4** Density difference plots (isovalue=0.0018 a.u.). The red/blue zones indicate an increase/decrease of the electronic density upon absorption of light.

## S4 Relative E<sup>\*</sup>/K<sup>\*</sup> free energies for the substituted compounds and barrier for proton transfer when dual emission is possible

### S4.1 Singly-substituted HBX, X=O, X=NH and X=CH<sub>2</sub>

**Table S2**  $\Delta G^{\text{ES}}$  and  $\Delta G^{\text{ES}\#}$  values for the singly-substituted HBX, X=O, X=NH and X=CH<sub>2</sub> series in cyclohexane. The  $\Delta G^{\text{ES}\#}$  values are only reported for intermediate HBO and HBI cases that present a  $\Delta G^{\text{ES}}$  between 0.00 and -0.20 eV. Data are given in eV.

| R <sub>1</sub>   | R <sub>2</sub>   | R <sub>3</sub>   | R <sub>4</sub>   | X=O                    |                          | X=NH                   |                          | X=CH <sub>2</sub>      |
|------------------|------------------|------------------|------------------|------------------------|--------------------------|------------------------|--------------------------|------------------------|
|                  |                  |                  |                  | $\Delta G^{\text{ES}}$ | $\Delta G^{\text{ES}\#}$ | $\Delta G^{\text{ES}}$ | $\Delta G^{\text{ES}\#}$ | $\Delta G^{\text{ES}}$ |
| CN               | H                | H                | H                | -0.276                 |                          | -0.353                 |                          | -0.439                 |
| CF <sub>3</sub>  | H                | H                | H                | -0.253                 |                          | -0.374                 |                          | -0.421                 |
| F                | H                | H                | H                | -0.275                 |                          | -0.344                 |                          | -0.429                 |
| H                | H                | H                | H                | -0.314                 |                          | -0.388                 |                          | -0.463                 |
| OMe              | H                | H                | H                | -0.164                 | 0.014                    | -0.238                 |                          | -0.319                 |
| NH <sub>2</sub>  | H                | H                | H                | 0.056                  |                          | -0.010                 | 0.161                    | -0.182                 |
| NMe <sub>2</sub> | H                | H                | H                | 0.226                  |                          | 0.140                  |                          | -0.026                 |
| H                | CN               | H                | H                | -0.246                 |                          | -0.350                 |                          | -0.402                 |
| H                | CF <sub>3</sub>  | H                | H                | -0.285                 |                          | -0.399                 |                          | -0.449                 |
| H                | F                | H                | H                | -0.285                 |                          | -0.374                 |                          | -0.434                 |
| H                | H                | H                | H                | -0.314                 |                          | -0.388                 |                          | -0.463                 |
| H                | OMe              | H                | H                | -0.184                 | -0.069                   | -0.268                 |                          | -0.298                 |
| H                | NH <sub>2</sub>  | H                | H                | -0.057                 | 0.018                    | -0.152                 | 0.018                    | -0.183                 |
| H                | NMe <sub>2</sub> | H                | H                | 0.091                  |                          | 0.029                  |                          | -0.008                 |
| H                | H                | CN               | H                | -0.262                 |                          | -0.356                 |                          | -0.425                 |
| H                | H                | CF <sub>3</sub>  | H                | -0.349                 |                          | -0.417                 |                          | -0.484                 |
| H                | H                | F                | H                | -0.336                 |                          | -0.361                 |                          | -0.454                 |
| H                | H                | H                | H                | -0.314                 |                          | -0.388                 |                          | -0.463                 |
| H                | H                | OMe              | H                | -0.188                 | -0.035                   | -0.260                 |                          | -0.312                 |
| H                | H                | NH <sub>2</sub>  | H                | -0.161                 | 0.013                    | -0.219                 |                          | -0.336                 |
| H                | H                | NMe <sub>2</sub> | H                | 0.004                  | 0.129                    | -0.010                 | <sup>a</sup>             | -0.225                 |
| H                | H                | H                | CN               | -0.323                 |                          | -0.397                 |                          | -0.472                 |
| H                | H                | H                | CF <sub>3</sub>  | -0.350                 |                          | -0.452                 |                          | -0.485                 |
| H                | H                | H                | F                | -0.254                 |                          | -0.362                 |                          | -0.427                 |
| H                | H                | H                | H                | -0.314                 |                          | -0.388                 |                          | -0.463                 |
| H                | H                | H                | OMe              | -0.204                 | -0.134                   | -0.346                 |                          | -0.348                 |
| H                | H                | H                | NH <sub>2</sub>  | -0.001                 | -0.090                   | -0.157                 | -0.124                   | -0.143                 |
| H                | H                | H                | NMe <sub>2</sub> | 0.050                  |                          | -0.126                 | -0.114                   | -0.170                 |

<sup>a</sup>The TS calculation failed to properly converge.

## S4.2 Doubly-substituted HBO

The additivity equation reads

$$\Delta(\Delta G_{R_1, R_3}^{\text{ES}})_{\text{add}} = \Delta(\Delta G_{R_1}^{\text{ES}}) + \Delta(\Delta G_{R_3}^{\text{ES}}) \quad (\text{S1})$$

**Table S3** Theoretical results for a series of HBO dyes in cyclohexane. The data reported in this Table corresponds to the additive contribution of the substituents  $[\Delta(\Delta G_{R_1, R_3}^{\text{ES}})_{\text{add}}]$  calculated as the sum of the contribution of each substituent  $[\Delta(\Delta G_{R_x}^{\text{ES}})]$  found in Table 2 in the main text. For more details, see the caption of Table 2.

| R <sub>1</sub> \ R <sub>3</sub> | $\Delta(\Delta G_{R_1, R_3}^{\text{ES}})_{\text{add}}$ |                 |        |       |       |                 |                  |
|---------------------------------|--------------------------------------------------------|-----------------|--------|-------|-------|-----------------|------------------|
|                                 | CN                                                     | CF <sub>3</sub> | F      | H     | OMe   | NH <sub>2</sub> | NMe <sub>2</sub> |
| CN                              | 0.091                                                  | 0.003           | 0.016  | 0.038 | 0.167 | 0.191           | 0.356            |
| CF <sub>3</sub>                 | 0.114                                                  | 0.026           | 0.039  | 0.061 | 0.188 | 0.214           | 0.379            |
| F                               | 0.092                                                  | 0.004           | 0.017  | 0.039 | 0.166 | 0.192           | 0.357            |
| H                               | 0.053                                                  | -0.035          | -0.022 | 0.000 | 0.127 | 0.153           | 0.318            |
| OMe                             | 0.203                                                  | 0.115           | 0.128  | 0.150 | 0.277 | 0.303           | 0.468            |
| NH <sub>2</sub>                 | 0.407                                                  | 0.335           | 0.348  | 0.370 | 0.497 | 0.523           | 0.688            |
| NMe <sub>2</sub>                | 0.593                                                  | 0.505           | 0.518  | 0.540 | 0.667 | 0.693           | 0.858            |



**Table S4**  $\Delta G^{\text{ES}}$  and  $\Delta G^{\text{ES}\#}$  values for the doubly-substituted HBO series in cyclohexane. The  $\Delta G^{\text{ES}\#}$  values are only reported for intermediate cases, *i.e.*, when a  $\Delta G^{\text{ES}}$  between 0.00 and -0.20 eV is computed. Data are given in eV.

| R <sub>1</sub>   | R <sub>2</sub> | R <sub>3</sub>   | R <sub>4</sub> | $\Delta G^{\text{ES}}$ | $\Delta G^{\text{ES}\#}$ |
|------------------|----------------|------------------|----------------|------------------------|--------------------------|
| CN               | H              | CN               | H              | -0.243                 |                          |
| CN               | H              | CF <sub>3</sub>  | H              | -0.341                 |                          |
| CN               | H              | F                | H              | -0.238                 |                          |
| CN               | H              | H                | H              |                        |                          |
| CN               | H              | OMe              | H              | -0.160                 | -0.048                   |
| CN               | H              | NH <sub>2</sub>  | H              | -0.135                 | 0.018                    |
| CN               | H              | NMe <sub>2</sub> | H              | 0.036                  |                          |
| CF <sub>3</sub>  | H              | CN               | H              | -0.243                 |                          |
| CF <sub>3</sub>  | H              | CF <sub>3</sub>  | H              | -0.312                 |                          |
| CF <sub>3</sub>  | H              | F                | H              | -0.326                 |                          |
| CF <sub>3</sub>  | H              | H                | H              |                        |                          |
| CF <sub>3</sub>  | H              | OMe              | H              | -0.150                 | -0.024                   |
| CF <sub>3</sub>  | H              | NH <sub>2</sub>  | H              | -0.108                 | 0.057                    |
| CF <sub>3</sub>  | H              | NMe <sub>2</sub> | H              | 0.018                  |                          |
| F                | H              | CN               | H              | -0.224                 |                          |
| F                | H              | CF <sub>3</sub>  | H              | -0.320                 |                          |
| F                | H              | F                | H              | -0.291                 |                          |
| F                | H              | H                | H              |                        |                          |
| F                | H              | OMe              | H              | -0.138                 | -0.005                   |
| F                | H              | NH <sub>2</sub>  | H              | -0.116                 | 0.038                    |
| F                | H              | NMe <sub>2</sub> | H              | 0.057                  |                          |
| OMe              | H              | CN               | H              | -0.042                 | 0.104                    |
| OMe              | H              | CF <sub>3</sub>  | H              | -0.125                 | 0.076                    |
| OMe              | H              | F                | H              | -0.131                 | 0.084                    |
| OMe              | H              | H                | H              |                        |                          |
| OMe              | H              | OMe              | H              | -0.041                 | 0.119                    |
| OMe              | H              | NH <sub>2</sub>  | H              | -0.025                 | 0.137                    |
| OMe              | H              | NMe <sub>2</sub> | H              | 0.095                  |                          |
| NH <sub>2</sub>  | H              | CN               | H              | 0.208                  |                          |
| NH <sub>2</sub>  | H              | CF <sub>3</sub>  | H              | 0.155                  |                          |
| NH <sub>2</sub>  | H              | F                | H              | 0.093                  |                          |
| NH <sub>2</sub>  | H              | H                | H              |                        |                          |
| NH <sub>2</sub>  | H              | OMe              | H              | 0.083                  |                          |
| NH <sub>2</sub>  | H              | NH <sub>2</sub>  | H              | 0.031                  |                          |
| NH <sub>2</sub>  | H              | NMe <sub>2</sub> | H              | 0.126                  |                          |
| NMe <sub>2</sub> | H              | CN               | H              | 0.428                  |                          |
| NMe <sub>2</sub> | H              | CF <sub>3</sub>  | H              | 0.358                  |                          |
| NMe <sub>2</sub> | H              | F                | H              | 0.270                  |                          |
| NMe <sub>2</sub> | H              | H                | H              |                        |                          |
| NMe <sub>2</sub> | H              | OMe              | H              | 0.238                  |                          |
| NMe <sub>2</sub> | H              | NH <sub>2</sub>  | H              | 0.206                  |                          |
| NMe <sub>2</sub> | H              | NMe <sub>2</sub> | H              | 0.253                  |                          |

---

## References

- 1 W. Al-Soufi, K. H. Grellmann and B. Nickel, *J. Phys. Chem.*, 1991, **95**, 10503–10509.
- 2 O. K. Abou-Zied, *RSC Adv.*, 2013, **3**, 8747–8755.
- 3 J. Seo, S. Kim, S. Park and S. Y. Park, *Bull. Korean. Chem. Soc.*, 2005, **26**, 1706–1710.
- 4 M. G. Holler, L. F. Campo, A. Brandelli and V. Stefani, *J. Photochem. Photobiol. A: Chem.*, 2002, **149**, 217–225.
- 5 F. S. Rodembusch, F. P. Leusin, L. F. Campo and V. Stefani, *J. Luminesc.*, 2007, **126**, 728–734.
- 6 R. F. Affeldt, A. C. de Amorim Borges, D. Russowsky and F. Severo Rodembusch, *New J. Chem.*, 2014, **38**, 4607–4614.
- 7 V. S. Padalkar, P. Ramasami and N. Sekar, *J. Luminesc.*, 2014, **146**, 527–538.
- 8 N. Jiang, C. Yang, X. Dong, X. Sun, D. Zhang and C. Liu, *Org. Biomol. Chem.*, 2014, **12**, 5250–5259.
- 9 M. Gutierrez, N. Alarcos, M. Liras, F. Sánchez and A. Douhal, *J. Phys. Chem. B*, 2015, **119**, 552–562.
- 10 J. Seo, S. Kim and S. Y. Park, *J. Am. Chem. Soc.*, 2004, **126**, 11154–11155.
- 11 N. Alarcos, M. Gutiérrez, M. Liras, F. Sánchez and A. Douhal, *Phys. Chem. Chem. Phys.*, 2015, **17**, 16257–16269.
- 12 N. Alarcos, M. Gutiérrez, M. Liras, F. Sánchez, M. Moreno and A. Douhal, *Phys. Chem. Chem. Phys.*, 2015, **17**, 14569–14581.
- 13 F. A. S. Chipem and G. Krishnamoorthy, *J. Phys. Chem. B*, 2013, **117**, 14079–14088.
- 14 A. Douhal, F. Amat-Guerri, M. Lillo and A. Acuña, *J. Photochem. Photobiol. A: Chem.*, 1994, **78**, 127–138.
- 15 S. R. Vazquez, M. C. R. Rodriguez, M. Mosquera and F. Rodriguez-Prieto, *J. Phys. Chem. A*, 2008, **112**, 376–387.
- 16 V. S. Padalkar, P. Ramasami and N. Sekar, *J. Fluoresc.*, 2013, **23**, 839–851.
